# Supplementary material for: Guselkumab More Effectively Neutralizes Psoriasis-Associated Histologic, Transcriptomic, and Clinical Measures than Ustekinumab
Source: PubMed Central journal article supplement — Immunohorizons. 2023 Apr 18;7(4):273–85. doi: 10.4049/immunohorizons.2300003 (PMC10579843; doi:10.4049/immunohorizons.2300003), 2023-04-18
Supplement: IH_2300003_Supplemental_1.pdf [file IH_2300003_Supplemental_1.pdf]

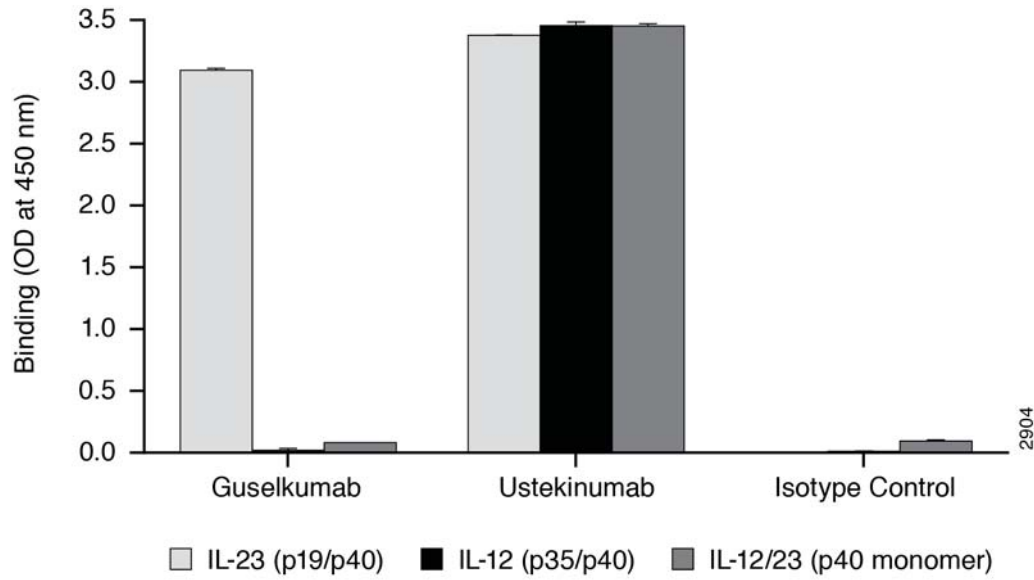

**Supplemental Figure 1. In vitro binding assay: guselkumab specifically binds to IL-23p19, whereas ustekinumab specifically binds to IL-12/23p40.** Plates were coated with guselkumab, ustekinumab, or a negative isotype control antibody. Recombinant human IL-23, IL-12, or IL-12/23p40 monomer was added, and bound cytokines were detected using a biotinylated IL-12/23p40-specific mAb. Data are mean OD values of duplicate samples. *OD*, optical density

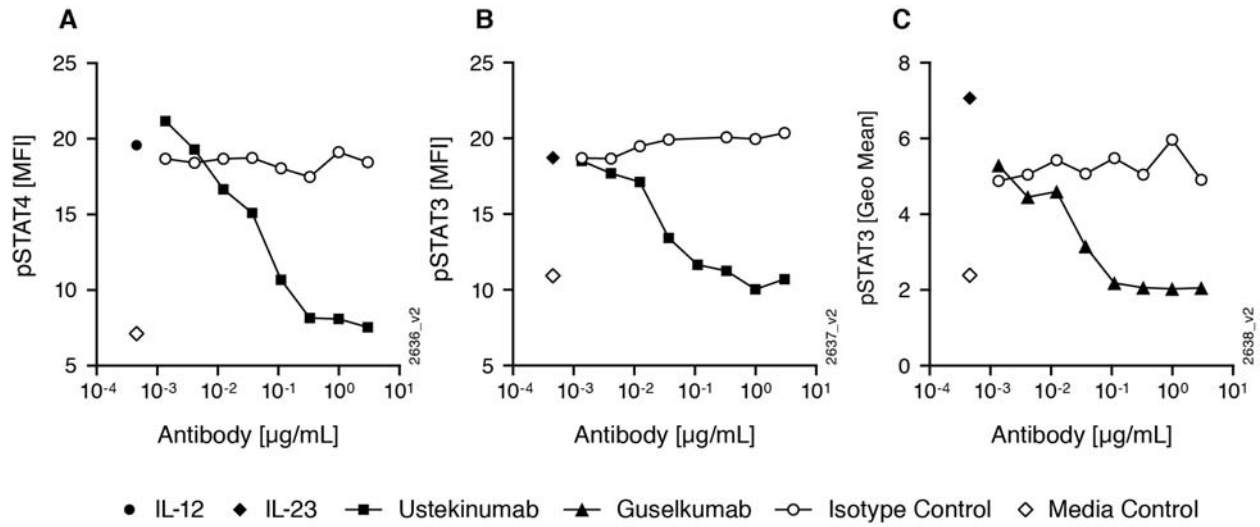

**Supplemental Figure 2. Neutralization of IL-12 and IL-23 signaling mediated by STAT-3 and STAT-4.** Neutralization of IL-12-mediated STAT-4 (A) and IL-23-mediated STAT-3 phosphorylation by ustekinumab (B) and guselkumab (C) in human NKL cells. Recombinant human IL-12 or IL-23 was pre-incubated with ustekinumab, guselkumab, or an isotype control antibody. Cells were stimulated with rhIL-12 or rhIL-23, alone or with preincubated mixtures of antibody. Detection of intracellular phosphorylated STAT-3 or STAT-4 was performed by flow cytometry. *Geo*, *geometric*; *MFI*, *mean fluorescence intensity*; *NKL*, *natural killer cell line*; *rh*, *recombinant human*

**Supplemental Table II. Baseline demographic and disease characteristics of NAVIGATE****patient cohorts**

| Baseline characteristic                           | Full cohort     | Cytokine cohort | p-value <sup>1</sup> |
|---------------------------------------------------|-----------------|-----------------|----------------------|
| Number of patients                                | 853             | 120             |                      |
| Age (years), mean $\pm$ SD                        | 43.0 $\pm$ 13.0 | 43.1 $\pm$ 13.2 | 0.95                 |
| Age at onset (years), mean $\pm$ SD               | 27.1 $\pm$ 14.4 | 26.4 $\pm$ 14.0 | 0.59                 |
| Male, n (%)                                       | 77 (64.2)       | 555 (65.1)      | 0.85                 |
| Race, n (%)                                       |                 |                 | 0.83                 |
| White                                             | 101 (84.2)      | 731 (85.7)      |                      |
| Asian                                             | 15 (12.5)       | 101 (11.8)      |                      |
| Other                                             | 4 (3.3)         | 21 (2.5)        |                      |
| BMI (kg/m <sup>2</sup> ), mean $\pm$ SD           | 29.7 $\pm$ 7.3  | 29.6 $\pm$ 6.9  | 0.92                 |
| Psoriatic arthritis, n (%)                        | 18 (15.0)       | 126 (14.8)      | 0.95                 |
| Psoriasis disease duration (years), mean $\pm$ SD | 15.9 $\pm$ 12.5 | 16.8 $\pm$ 12.2 | 0.49                 |
| BSA (%), mean $\pm$ SD                            | 28.5 $\pm$ 19.2 | 28.1 $\pm$ 16.8 | 0.80                 |
| IGA score, n (%)                                  |                 |                 | 0.57                 |
| Moderate (3)                                      | 93 (77.5)       | 680 (79.7)      |                      |
| Severe (4)                                        | 27 (22.5)       | 173 (20.3)      |                      |
| PASI score (0-72), mean $\pm$ SD                  | 21.0 $\pm$ 9.6  | 21.6 $\pm$ 9.3  | 0.50                 |
| Previous treatment, n (%)                         |                 |                 |                      |
| Topical agents                                    | 118 (98.3)      | 816 (95.7)      | 0.16                 |
| Phototherapy                                      | 53 (44.2)       | 431 (50.6)      | 0.19                 |
| Nonbiological systemics                           | 61 (50.8)       | 455 (53.3)      | 0.61                 |
| TNFi                                              | 19 (15.8)       | 121 (14.2)      | 0.63                 |

<sup>1</sup>Derived from t-test.

*BMI, body mass index; BSA, body surface area affected by psoriasis; IGA, Investigator's Global Assessment of psoriasis; PASI, psoriasis area and severity index; TNFi, tumor necrosis factor-inhibitors*
